# Supplementary material for: The prognosis, chemotherapy and immunotherapy efficacy of the SUMOylation pathway signature and the role of UBA2 in lung adenocarcinoma
Source: publisher site journal article supplement (doi:10.18632/aging.205594), 2024-02-23
Supplement: Supplementary file [file aging-v16i5-205594-supplementary-material-SD1.pdf]

**SUPPLEMENTARY FIGURE**

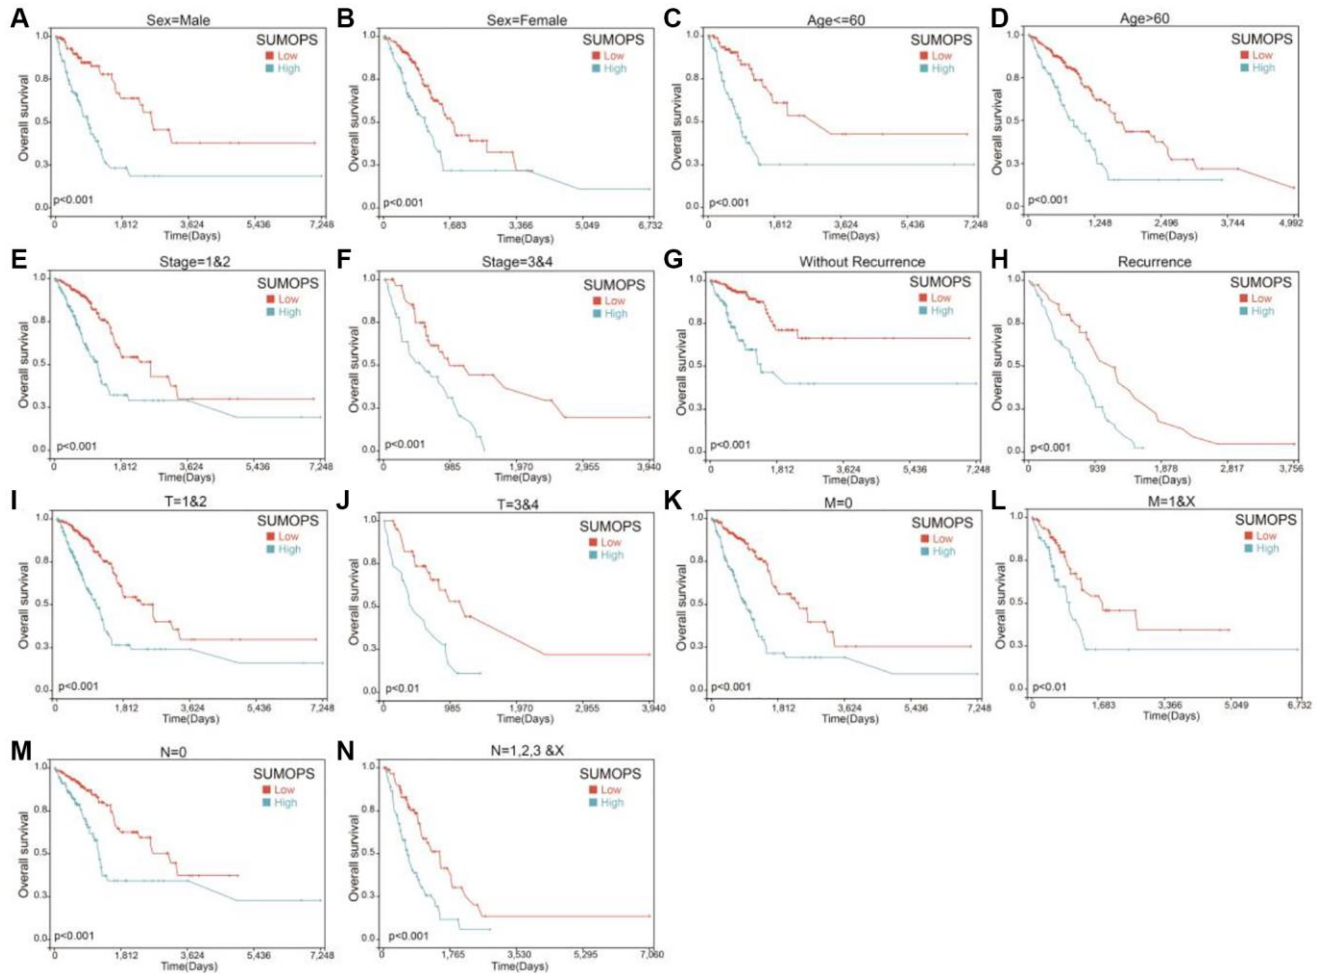

**Supplementary Figure 1. The prognostic value of the SUMOPS for different clinical factors in LUAD.** Comparisons of the overall survival differences between the SUMOPS-low and the SUMOPS-high subtypes in the LUAD patient subgroups categorized by (A) male and (B) female, (C) age ≤60 years, (D) age >60 years, (E) stage = 1–2, (F) stage = 3–4, (G) without recurrence, (H) recurrence, (I) stage T = 1–2, (J) stage T = 3–4, (K) stage M = 0, (L) stage M = 1&X, (M) stage N = 0, and (N) stage N = 1,2,3&X.
